1 **1-Methylnicotinamide is an immune regulatory metabolite in human ovarian cancer**

2 Marisa K. Kilgour<sup>1,2</sup>, Sarah MacPherson<sup>2</sup>, Lauren Zacharias<sup>3</sup>, Sarah Keyes<sup>1</sup>, Brenna Pauly<sup>1</sup>, Bertrand  
3 Allard<sup>4</sup>, Julian Smazynski<sup>1,2</sup>, Peter H. Watson<sup>2,5</sup>, John Stagg<sup>4</sup>, Brad H. Nelson<sup>1,2,6</sup>, Ralph J.  
4 DeBerardinis<sup>3,7</sup> & Phineas T. Hamilton<sup>2</sup>, Julian J. Lum<sup>1,2\*</sup>

5 1. Department of Biochemistry and Microbiology, University of Victoria, Victoria, BC, Canada

6 2. Deeley Research Centre, BC Cancer, Victoria, BC, Canada

7 3. Children's Research Institute, UT Southwestern, Dallas, Texas, US

8 4. Centre de Recherche du Centre Hospitalier de l'Université de Montréal, Faculté de Pharmacie,  
9 Université de Montréal, Institut du Cancer de Montréal, Quebec, Canada

10 5. Biobanking and Biospecimen Research Services, Deeley Research Centre, BC Cancer, Victoria,  
11 British, Columbia, Canada

12 6. Department of Medical Genetics, University of British Columbia, Vancouver, BC, Canada

13 7. Howard Hughes Medical Institute, UT Southwestern Medical Center, Dallas, TX, US

14 \*Correspondence: [jjlum@bccancer.bc.ca](mailto:jjlum@bccancer.bc.ca)

15 **ABSTRACT**

16 **Immune regulatory metabolites are key features of the tumor microenvironment (TME), yet with**  
17 **a few notable exceptions, their identities remain largely unknown. We uncovered the immune**  
18 **regulatory metabolic states and metabolomes of sorted tumor and stromal, CD4+, and CD8+ cells**  
19 **from the tumor and ascites of patients with high-grade serous ovarian cancer (HGSC) using high-**  
20 **dimensional flow cytometry and metabolomics supplemented with single cell RNA sequencing.**  
21 **Flow cytometry revealed that tumor cells show a consistently greater uptake of glucose than T**  
22 **cells, but similar mitochondrial activity. Cells within the ascites and tumor had pervasive**  
23 **metabolite differences, with a striking enrichment in 1-methylnicotinamide (MNA) in T cells**  
24 **infiltrating the tumor compared to ascites. Despite the elevated levels of MNA in T cells, the**  
25 **expression of nicotinamide N-methyltransferase, the gene encoding the enzyme that catalyses the**  
26 **transfer of a methyl group from S-adenosylmethionine to nicotinamide, was restricted to**  
27 **fibroblasts and tumor cells. Treatment of T cells with MNA resulted in an increase in T cell-**  
28 **mediated secretion of the tumor promoting cytokine tumor necrosis factor alpha. Thus, the TME-**  
29 **derived metabolite MNA contributes to an alternative and non-cell autonomous mechanism of**  
30 **immune modulation of T cells in HGSC. Collectively, uncovering the tumor-T cell metabolome**  
31 **may reveal metabolic vulnerabilities that can be exploited using T cell-based immunotherapies to**  
32 **treat human cancer.**

33 Tumor-derived metabolites can have profound suppressive effects on anti-tumor immunity, with  
34 increasing evidence that they can also function as key drivers of disease progression<sup>1,2</sup>. Beyond the  
35 Warburg effect, recent work has begun to characterize the metabolic states of tumor cells and their  
36 relationship to the immunological state of the TME. Studies in murine models have helped uncover the  
37 role of metabolites such as (R)-2-hydroxyglutarate<sup>3</sup>, BH4<sup>4</sup> and methylglyoxal<sup>5</sup> as well as pathways  
38 including glutamine metabolism<sup>6</sup>, oxidative metabolism<sup>7</sup>, and glucose metabolism<sup>8</sup> that impact T cell  
39 function and antitumor immunity. Furthermore, studies in humans have elucidated key metabolic  
40 pathways in tumors, for example demonstrating that tumors can use lactate as fuel<sup>9</sup>. Despite this, the  
41 diversity and impact of specific metabolites on tumor-infiltrating lymphocytes (TILs) are largely  
42 unknown. To characterize this diversity and better understand how metabolites in the TME influence T  
43 cell function, a combined flow cytometry and mass-spectrometry approach was used to profile tumor  
44 and TIL from patients with HGSC. Using this approach two spatially distinct microenvironments were  
45 interrogated, the ascites<sup>10</sup> and tumor, within the same patients to reveal potential reciprocal metabolic  
46 interactions between tumor cells and TIL.

47

48 The phenotypic and metabolic states of cells in the matched ascites and tumor environments from six  
49 patients with HGSC (Extended Data Table 1) were evaluated using high-dimensional flow cytometry to  
50 synchronously quantify glucose uptake (2-(N-(7-Nitrobenz-2-oxa-1,3-diazol-4-yl)Amino)-2-  
51 Deoxyglucose, 2-NBDG) and mitochondrial activity (MitoTracker Deep Red)<sup>5,11,12</sup> alongside canonical  
52 markers to distinguish immune and tumor cell populations (Extended Data Table 2, Extended Data Fig.  
53 1a). This revealed high levels of glucose uptake in tumor cells relative to T cells in both the ascites and  
54 tumor, but more modest differences in mitochondrial activity. Tumor cells (CD45-EpCAM+) had on  
55 average 3-4 times the glucose uptake of T cells, whereas CD4+ T cells had on average 1.2 times the  
56 glucose uptake of CD8+ T cells, suggesting that TILs have different metabolic requirements even within

57 the same TME (Fig. 1a). In contrast, the mitochondrial activity in tumor cells was similar to CD4+ T  
58 cells, and both had greater mitochondrial activity than CD8+ T cells (Fig. 1b). Collectively, these results  
59 reveal a metabolic hierarchy, with tumor cells more active than CD4+ T cells, and CD4+ T cells more  
60 metabolically active than CD8+ T cells. Despite these effects across cell types, there were no consistent  
61 differences in the metabolic states of CD4+ and CD8+ T cells, or their relative proportions, in the ascites  
62 compared to the tumor (Fig. 1c). Conversely, within the CD45- cell fraction, there was an increase in the  
63 proportion of EpCAM+ cells in the tumor compared to the ascites (Extended Data Fig. 1b). We also  
64 observed clear metabolic differences among EPCAM+ and EPCAM- cell fractions. EPCAM+ (tumor)  
65 cells had substantially greater glucose uptake and mitochondrial activity than EPCAM- cells, consistent  
66 with much higher metabolic activity in tumor cells than fibroblasts in the TME (Extended Data Fig. 1c,  
67 d).

68

69 Further analysis revealed other clear differences when considering more highly-resolved phenotypic  
70 states of T cells<sup>13</sup>. Indeed, activated (Extended Data Fig. 1e-g) and effector memory (Extended Data Fig.  
71 1h, i) T cells were much more frequent (as a proportion of T cells) in the tumor than ascites. Similarly,  
72 resolving phenotypes by the expression of activation markers (PD1, CD25, CD137) revealed that while  
73 these populations showed some differences in metabolism (Extended Data Fig. 2a-e), no consistently  
74 significant metabolic differences were observed between naïve, effector, or memory cells (defined by  
75 CCR7 and CD45RO, Extended Data Fig. 2f-i). These results were confirmed through automated  
76 assignment of cell phenotypes using machine learning method<sup>14</sup>, which further revealed an abundant  
77 myeloid cell population (CD3-/CD4+) predominately in patient ascites that displayed the highest  
78 glucose uptake and mitochondrial activity of any identified cell type (Extended Data Fig 3). These  
79 results underscore strong metabolic differences across different cell types found in the ascites and  
80 tumors of HGSC patients.

81 A major challenge in understanding the metabolomic profiles of TIL has been the need to isolate  
82 samples of T cells of sufficient purity, quality and quantity from tumors. Recent studies have shown that  
83 flow cytometry based sorting and bead enrichment methods can cause alterations in cellular metabolite  
84 profiles<sup>15-17</sup>. To overcome this, we optimized a bead enrichment approach to isolate and separate TIL  
85 from surgically resected human ovarian cancers prior to analysis by liquid chromatography tandem mass  
86 spectrometry (LC-MS/MS) (See Methods; Extended Data Fig. 4a). To assess the overall impact of this  
87 protocol on metabolite changes, we compared the metabolite profiles of activated T cells following bead  
88 isolation to cells that did not undergo bead isolation but remained on ice, and found high correlation  
89 among methods ( $r = 0.77$ ), as well as high reproducibility among technical replicates for this panel of 86  
90 metabolites (see Extended Data Fig. 4b). These methods thus enabled accurate metabolite profiling in  
91 cells undergoing enrichment, to provide a first high-resolution platform for the identification of specific  
92 metabolites in HGSC thereby allowing deeper insight into cell-specific metabolic programs.

93

94 We applied this enrichment method to profile 99 metabolites in CD4+, CD8+, and CD45- cell fractions  
95 from the primary ascites and tumor of six patients with HGSC (Extended Data Fig. 4c). Profiling  
96 revealed strong metabolic separation of cell types within and across patients (Fig. 2a, Extended Data  
97 Fig. 5a). In particular, patient 70 had distinct metabolic profiles compared to other patients (Fig. 2b,  
98 Extended Data Fig. 5b), indicating the potential for substantial metabolic heterogeneity among patients.  
99 Notably, patient 70 had a smaller total volume of ascites collected (80 mL) compared to the other  
100 patients (1.2-2 L) (Extended Data Table 1). Controlling for inter-patient heterogeneity during principal  
101 component analysis (e.g. using partial redundancy analysis) revealed consistent changes among cell  
102 types, with clear clustering of cell types and/or microenvironments based on metabolite profile (Fig. 2c).  
103 Analyses of single metabolites underscored these effects and revealed dramatic differences among cell  
104 types and microenvironments. Notably, the most extreme difference observed was for 1-

105 methylnicotinamide (MNA), which was enriched in CD45<sup>-</sup> cells in general, and ~10-100-fold in T cells  
106 when they infiltrated the tumor (Fig. 3a). This effect was most pronounced for CD4<sup>+</sup> T cells; while  
107 MNA in CD8<sup>+</sup> cells also appeared to be strongly affected by the environment, this was not significant as  
108 tumor CD8<sup>+</sup> fractions were only evaluable for three of the six patients.

109

110 MNA is produced by the transfer of a methyl group from s-adenosyl-L-methionine (SAM) to  
111 nicotinamide (NA) by nicotinamide N-methyltransferase (NNMT). *NNMT* is over-expressed in multiple  
112 human cancers and has been linked to proliferation, invasion, and metastasis. To better understand the  
113 source of MNA in T cells in the TME, we used single cell RNA sequencing (scRNA-seq) to characterize  
114 *NNMT* expression across cell types in the ascites and tumor of three patients with HGSC (Extended Data  
115 Table 3). Profiling ~6,500 cells revealed that *NNMT* expression was confined to presumptive fibroblast  
116 and tumor cell populations in both the ascites and tumor environments (Fig. 3b,c). Notably, there was no  
117 appreciable *NNMT* expression in any *PTPRC*-expressing (CD45<sup>+</sup>) populations (Fig. 3c), suggesting the  
118 MNA detected in metabolite profiling is imported into T cells. The expression of aldehyde oxidase 1  
119 (*AOX1*), which converts MNA to 1-methyl-2-pyridone-5-carboxamide (2-PYR) or 1-methyl-4-pyridone-  
120 5-carboxamide (4-PYR), was likewise restricted to fibroblast populations (Extended Data Fig. 6),  
121 collectively suggesting that T cells lack the capacity for conventional MNA metabolism. This metabolite  
122 profile and scRNA-seq analysis also revealed similar, although less dramatic, patterns for both L-  
123 kynurenine and adenosine (Extended Data Fig. 7), two well-characterized immunosuppressive  
124 metabolites that were also elevated in T cells from the tumor, and/or in tumor cells. These trends,  
125 coupled with the striking enrichment of MNA in T cells within the tumor, raised the possibility that  
126 secretion of MNA into the TME may modulate the phenotypes of TIL to compromise antitumor  
127 immunity.

128 To determine the impact of MNA on T cells, healthy donor T cells were activated in the presence of  
129 MNA and assessed for proliferation and function. Addition of MNA did not lead to decreased  
130 proliferation or viability in either CD4<sup>+</sup> or CD8<sup>+</sup> T cells after 7 days (Fig. 4a), but rather increased the  
131 proportion of CD4<sup>+</sup> and CD8<sup>+</sup> T cells that expressed tumor necrosis factor alpha (TNF $\alpha$ ) (Fig. 4b).  
132 While TNF $\alpha$  has been reported to have context-dependent pro- and anti-tumor effects, it has a well-  
133 described role in promoting ovarian cancer growth and metastasis<sup>18-20</sup>. Patients with ovarian cancer have  
134 been reported to have higher concentrations of TNF $\alpha$  within their ascites and tumor tissue than selected  
135 benign tissue<sup>21-23</sup>. Mechanistically, TNF $\alpha$  can modulate activation, function and proliferation of  
136 leukocytes, and change the phenotype of cancer cells<sup>24,25</sup>. Consistent with these findings, differential  
137 expression analysis of T cell populations between the ascites and tumor also revealed a significant up-  
138 regulation of *TNF* on T cells in the tumor relative to the ascites. Importantly, the increase in *TNF* was  
139 only apparent for T cell populations that did not exhibit a cytotoxic phenotype (Fig. 4c). Taken together,  
140 these data support the notion of a dual immune suppressive and tumor promoting role for MNA in  
141 HGSC.

142  
143 By applying a combined metabolomics approach, this study revealed pervasive immune metabolome  
144 differences between cells within the tumor and ascites of HGSC patients. This integrated analysis  
145 demonstrated differences in glucose uptake and mitochondrial activity between T cells and tumor cells  
146 in HGSC. However, these flow-based methods of assessing metabolism, while methodologically  
147 straightforward and providing single cell resolution, do not provide sufficient information regarding the  
148 cellular impacts of specific metabolites that function in cis or in trans within a given cell type.  
149 Importantly, our work uncovered a previously unrecognized metabolite MNA as differentially abundant  
150 between compartments and cell types. *In vitro*, MNA increased T cell-mediated secretion of the tumor  
151 promoting cytokine TNF $\alpha$ , providing insight for an alternative and non-cell autonomous role of MNA as  
152 an immune modulator in the ovarian TME.

153 **References**

- 154 1. Allard, B., Beavis, P. A., Darcy, P. K. & Stagg, J. Immunosuppressive activities of adenosine in  
155 cancer. *Curr. Opin. Pharmacol.* **29**, 7–16 (2016).
- 156 2. Labadie, B. W., Bao, R. & Luke, J. J. Reimagining IDO Pathway Inhibition in Cancer  
157 Immunotherapy via Downstream Focus on the Tryptophan–Kynurenine–Aryl Hydrocarbon Axis.  
158 *Clin. Cancer Res.* **25**, 1462–1471 (2019).
- 159 3. Bunse, L. *et al.* Suppression of antitumor T cell immunity by the oncometabolite (R)-2-  
160 hydroxyglutarate. *Nat. Med.* **24**, 1192–1203 (2018).
- 161 4. Cronin, S. J. F. *et al.* The metabolite BH4 controls T-cell proliferation in autoimmunity and cancer.  
162 *Nature* **563**, 564–568 (2018).
- 163 5. Baumann, T. *et al.* Regulatory myeloid cells paralyze T cells through cell–cell transfer of the  
164 metabolite methylglyoxal. *Nat. Immunol.* **21**, 555–566 (2020).
- 165 6. Leone, R. D. *et al.* Glutamine blockade induces divergent metabolic programs to overcome tumor  
166 immune evasion. *Science* **366**, 1013–1021 (2019).
- 167 7. Najjar, Y. G. *et al.* Tumor cell oxidative metabolism as a barrier to PD-1 blockade immunotherapy  
168 in melanoma. *JCI Insight* **4**, (2019).
- 169 8. Chang, C.-H. *et al.* Metabolic Competition in the Tumor Microenvironment Is a Driver of Cancer  
170 Progression. *Cell* **162**, 1229–1241 (2015).
- 171 9. Faubert, B. *et al.* Lactate metabolism in human lung tumors. *Cell* **171**, 358–371.e9 (2017).
- 172 10. Kipps, E., Tan, D. S. P. & Kaye, S. B. Meeting the challenge of ascites in ovarian cancer: new  
173 avenues for therapy and research. *Nat. Rev. Cancer* **13**, 273–282 (2013).
- 174 11. Scharping, N. E. *et al.* The Tumor Microenvironment Represses T Cell Mitochondrial Biogenesis to  
175 Drive Intratumoral T Cell Metabolic Insufficiency and Dysfunction. *Immunity* **45**, 374–388 (2016).
- 176 12. Ho, P.-C. *et al.* Phosphoenolpyruvate Is a Metabolic Checkpoint of Anti-tumor T Cell Responses.



- 177 *Cell* **162**, 1217–1228 (2015).
- 178 13. Rådestad, E. *et al.* Immune profiling and identification of prognostic immune-related risk factors in  
179 human ovarian cancer. *OncImmunity* **8**, e1535730 (2019).
- 180 14. Greene, E. *et al.* New interpretable machine learning method for single-cell data reveals correlates of  
181 clinical response to cancer immunotherapy. *bioRxiv* 702118 (2019) doi:10.1101/702118.
- 182 15. Ma, E. H. *et al.* Metabolic Profiling Using Stable Isotope Tracing Reveals Distinct Patterns of  
183 Glucose Utilization by Physiologically Activated CD8+ T Cells. *Immunity* **51**, 856-870.e5 (2019).
- 184 16. Binek, A. *et al.* Flow Cytometry Has a Significant Impact on the Cellular Metabolome. *J. Proteome*  
185 *Res.* **18**, 169–181 (2019).
- 186 17. Llufrío, E. M., Wang, L., Naser, F. J. & Patti, G. J. Sorting cells alters their redox state and cellular  
187 metabolome. *Redox Biol.* **16**, 381–387 (2018).
- 188 18. Kulbe, H. *et al.* The inflammatory cytokine tumor necrosis factor- $\alpha$  generates an autocrine  
189 tumor-promoting network in epithelial ovarian cancer cells. *Cancer Res.* **67**, 585–592 (2007).
- 190 19. Charles, K. A. *et al.* Infliximab, a humanised anti-TNF- $\alpha$  monoclonal antibody, exhibits biological  
191 activity in the ovarian tumor microenvironment in patients. *Cancer Res.* **66**, 1055–1056 (2006).
- 192 20. Salako, M. A. *et al.* Inhibition of the Inflammatory Cytokine TNF- $\alpha$  Increases Adenovirus Activity  
193 in Ovarian Cancer via Modulation of cIAP1/2 Expression. *Mol. Ther.* **19**, 490–499 (2011).
- 194 21. Sipak-Szmigiel, O. *et al.* Serum and peritoneal fluid concentrations of soluble human leukocyte  
195 antigen, tumor necrosis factor alpha and interleukin 10 in patients with selected ovarian pathologies.  
196 *J. Ovarian Res.* **10**, 25 (2017).
- 197 22. Szlosarek, P. W. *et al.* Expression and regulation of tumor necrosis factor alpha in normal and  
198 malignant ovarian epithelium. *Mol. Cancer Ther.* **5**, 382–390 (2006).
- 199 23. Piura, B. *et al.* Distinct Expression and Localization of TNF System in Ovarian Carcinoma Tissues:  
200 Possible Involvement of TNF- $\alpha$  in Morphological Changes of Ovarian Cancerous Cells. *Anticancer*  
201 *Res.* **34**, 745–752 (2014).

- 202 24. Montfort, A. *et al.* The TNF Paradox in Cancer Progression and Immunotherapy. *Front. Immunol.*  
203 **10**, (2019).
- 204 25. Charles, K. *et al.* The tumor-promoting actions of TNF- $\alpha$  involve TNFR1 and IL-17 in ovarian  
205 cancer in mice and humans. *J. Clin. Invest.* **119**, 3011–23 (2009).

206 **Figures**

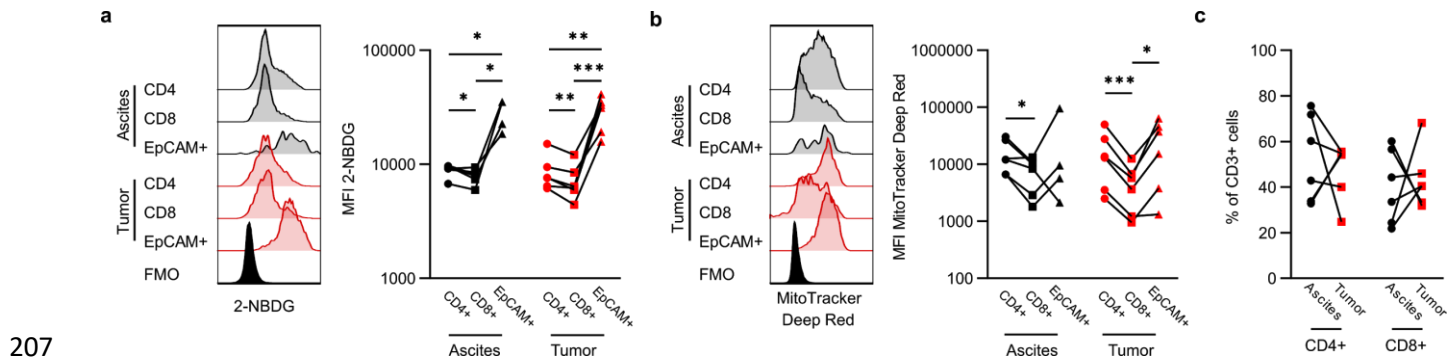

208 **Figure 1 | Tumor cells have greater glucose uptake but similar mitochondrial activity to T cells. a,**  
 209 **b,** Representative plot (left) and tabulated data (right) for median fluorescent intensity (MFI) of glucose  
 210 uptake (2-NBDG) (**a**) and mitochondrial activity (MitoTracker Deep Red) (**b**) of CD4+ T cells, CD8+ T  
 211 cells, and EpCAM+CD45- tumor cells from ascites and tumor. **c,** Proportion of CD4+ and CD8+ cells  
 212 (of CD3+ T cells) within ascites and tumor. P-values determined by paired t-test (\*p<0.05, \*\*p<0.01,  
 213 \*\*\*p<0.001) (**a-c**). Lines indicate matched patients (n=6). Fluorescence Minus One (FMO); Median  
 214 Fluorescence Intensity (MFI).

215

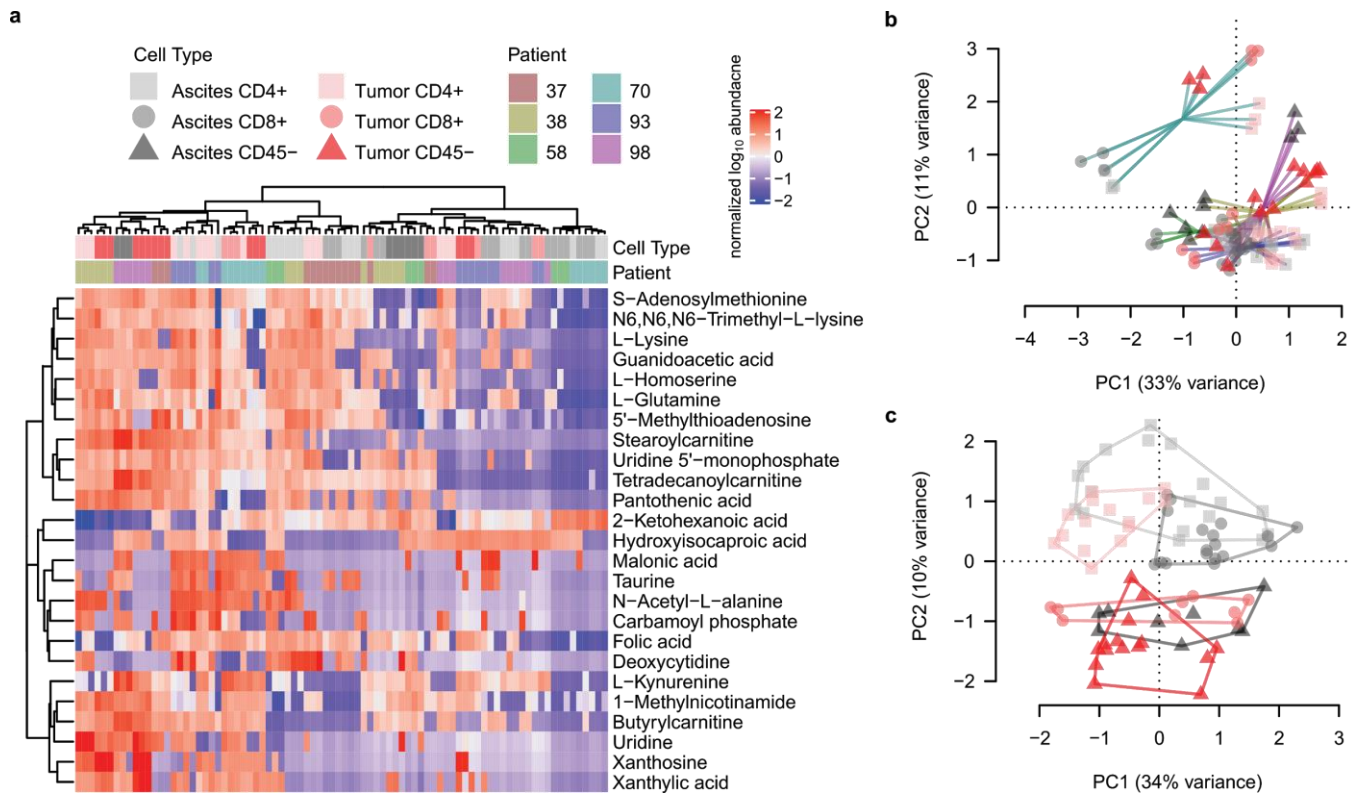

216

217 **Figure 2 | Metabolite profiling of matched ascites and tumor reveals key differences between**  
218 **tumor cells and T cells. a**, Heatmap of normalized metabolite abundance, with dendrograms  
219 representing Ward's clustering of Euclidean distances among samples. **b**, Principal components analysis  
220 (PCA) of sample metabolite profiles, showing triplicate replicates of each sample, with samples from the  
221 same patients joined by lines. **c**, PCA of sample metabolite profiles conditioned on patient (i.e. using  
222 partial redundancy); sample types are circumscribed by convex hulls.

223

224

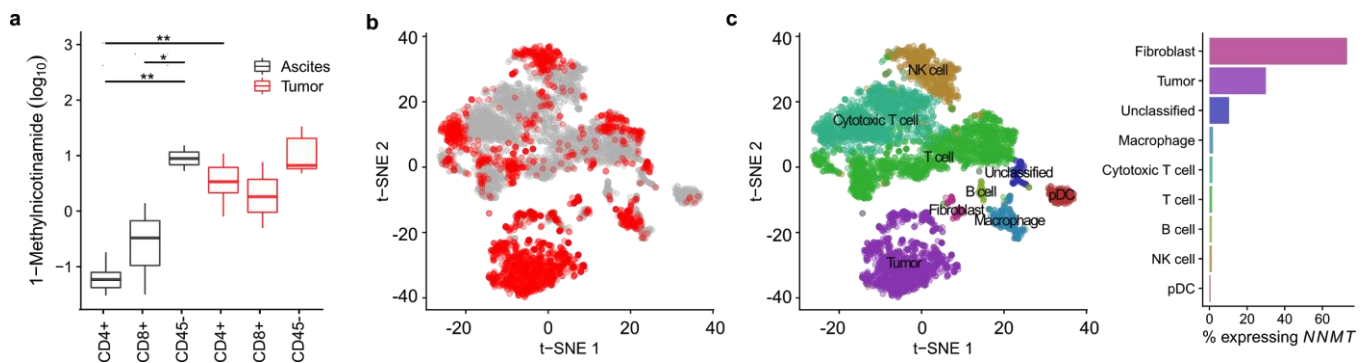

225 **Figure 3 | 1-Methylnicotinamide (MNA) is more abundant in T cells from the tumor compared to**

226 **ascites. a**, Normalized abundance of MNA in CD4+, CD8+ and CD45- cells from ascites and tumor.

227 Boxplots show medians (lines), interquartile range (box hinges) and range of data up to 1.5X

228 interquartile range (box whiskers). P-values are determined using *limma* with patient as a random effect,

229 as described in methods (\* $p < 0.05$ , \*\* $p < 0.01$ ). **b**, t-SNE of scRNA-seq of ascites (grey) and tumor

230 (n=3 patients). **c**, *NNMT* expression in different cellular populations identified using scRNA-seq.

231

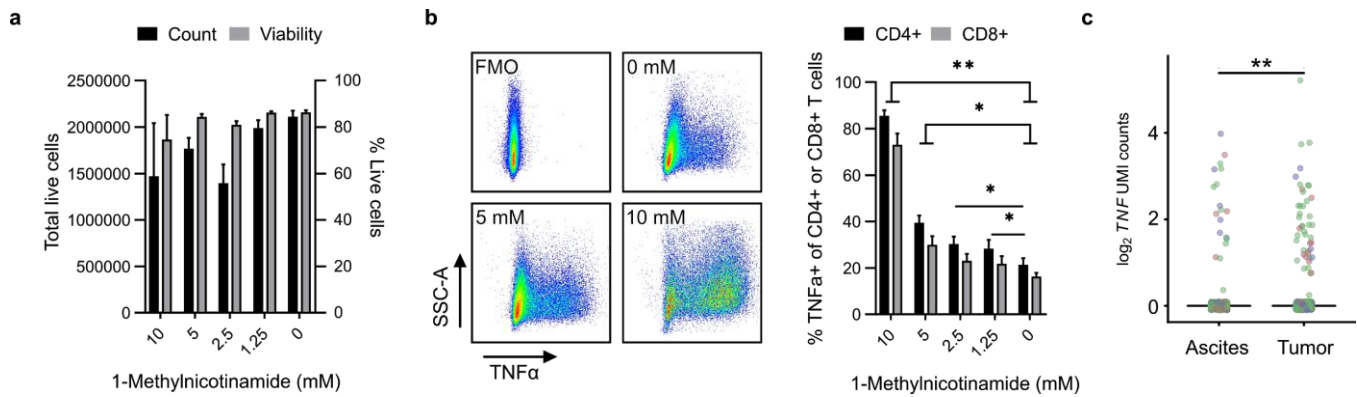

232

233 **Figure 4 | Exogenous MNA enhances TNF $\alpha$  expression in T cells. a,** Total live cell count and  
 234 viability directly from culture on day 7. Bar graphs represent mean with SEM of three healthy donors. **b,**  
 235 TNF $\alpha$  expression in T cells treated with exogenous MNA. T cells were activated using CD3/CD28 with  
 236 IL2 in respective concentrations of MNA for 7 days. Cells were stimulated with PMA/Ionomycin with  
 237 GolgiStop<sup>TM</sup> for 4 hours prior to analysis. Example plot of live cells (left) and tabulated data (right). Bar  
 238 graphs represent mean with SEM of 3 healthy donors. P-value determined using paired t-test (\*p<0.05,  
 239 \*\*p<0.01). **c,** T cells (non-cytotoxic) show increased expression of *TNF* in the tumor relative to the  
 240 ascites of HGSC. Colors represent different patients. Displayed cells have been randomly subsampled to  
 241 300 and jittered to limit overplotting ( $P_{adj} = 0.0076$ ).

## 242 **Methods**

243 **Patient sample collection and processing.** Patient specimens and clinical data were obtained through  
244 the BC Cancer Tumour Tissue Repository (TTR), certified by the Canadian Tissue Repository Network.  
245 All specimens and clinical data were obtained with either informed written consent or a formal waiver of  
246 consent under protocols approved by the Research Ethics Board of the BC Cancer Agency and the  
247 University of British Columbia (H07-00463). Samples are stored in a certified BioBank (BRC-00290).  
248 Detailed patient characteristics are shown in **Extended Data Table 1** and **Extended Data Table 3**.

249 For cryopreservation, patient tumor samples were mechanically disaggregated using a scalpel  
250 and pushed through a 100  $\mu$ m filter to obtain a single cell suspension. Patient ascites was centrifuged at  
251 1500 rpm for 10 minutes at 4 °C to pellet cells and remove supernatant. Cells obtained from tumor and  
252 ascites were cryopreserved in 50% heat inactivated human AB serum (Sigma), 40% RPMI-1640 (Fisher)  
253 and 10% DMSO.

254 **Cell culture reagents.** Complete media consisted of a 0.22  $\mu$ m filtered 50:50 supplemented  
255 RPMI1640:AimV. RPMI1640 + 2.05 mM L-Glutamine (Fisher) was supplemented with 10% heat  
256 inactivated human AB serum (Sigma), 12.5 mM HEPES (Fisher), 2 mM L-Glutamine (Fisher), 1x  
257 Penicillin Streptomycin solution (Fisher) and 50  $\mu$ M B-mercaptoethanol. AimV (Invitrogen) was  
258 supplemented with 20 mM HEPES (Fisher) and 2 mM L-glutamine (Fisher). Flow cytometry staining  
259 buffer consisted of 0.22  $\mu$ m filtered PBS (Invitrogen) supplemented with 3% heat inactivated AB human  
260 serum (Sigma). Cell enrichment buffer consisted of 0.22  $\mu$ m filtered PBS supplemented with 0.5% heat  
261 inactivated human AB serum (Sigma).

262 **Flow cytometry for metabolic profiling.** Cells were stained with 10 nM MitoTracker Deep Red (MT  
263 DR) and 100  $\mu$ M 2-(N-(7-Nitrobenz-2-oxa-1,3-diazol-4-yl)Amino)-2-Deoxyglucose (2-NBDG) for 30  
264 minutes in complete media at 37°C. Next, cells were stained with viability dye-eF506 for 15 minutes at  
265 4 °C. Cells were resuspended in Fc block (eBioscience) and Brilliant Stain Buffer (BD Bioscience)

266 diluted in flow cytometry staining buffer (according to manufacturer instructions) and incubated for 10  
267 minutes at room temperature. Cells were stained with a panel of antibodies (**Extended Data Table 3**) in  
268 flow cytometry staining buffer for 20 minutes at 4 °C. Cells were resuspended in flow cytometry  
269 staining buffer prior to analysis (Cytex Aurora; 3L-16V-14B-8R configuration).

270 Cytometry data were analyzed using SpectroFlo and FlowJo V10, and figures were created using  
271 GraphPad Prism 8. Median Fluorescent Intensity of 2-NBDG and MT DR were log<sub>10</sub> normalized prior to  
272 statistical analysis using paired t-test to account for matched patients. Any population with less than 40  
273 events was removed from the analysis, an MFI value of 1 was inputted for any negative values prior to  
274 statistical analysis and data visualization.

275 **Unbiased discovery of cell populations in flow cytometry data.** To supplement our manual gating  
276 strategy for the above flow panel, we used Full Annotation Using Shape-constrained Trees (FAUST)<sup>14</sup>  
277 to automatically assign cells to populations, after dead cell exclusion in FlowJo. We manually curated  
278 outputs to merge populations that appeared to be mis-assigned (merged PD1+ with PD1- tumor cells),  
279 and retained populations comprising, on average, more than 2% of cells in each sample, for a total of 11  
280 populations.

281 **Cell activation and enrichment for metabolite profiling optimization.** Peripheral blood mononuclear  
282 cells (PBMCs) were isolated from a Leukopheresis Pack (Stemcell) using Ficoll gradient density  
283 centrifugation. CD8+ T cells were isolated from the PBMCs using CD8 MicroBeads (Miltenyi) and  
284 expanded using TransAct (Miltenyi) for 2 weeks in complete media according to manufacturer's  
285 instructions. Cells were rested for 5 days in complete media with 10 ng/ml IL-7 (Peprotech) and then  
286 restimulated with TransAct. On day 7, cells were enriched using CD45 MicroBeads (Miltenyi) in three  
287 rounds of sequential enrichment according to the manufacturer's instructions. Cells were aliquoted for  
288 analysis by flow cytometry (described above) and 1 million cells were aliquoted in triplicate for analysis  
289 by LC-MS/MS. Samples were processed for LC-MS/MS as described below. We imputed missing



290 metabolite values with an ion count of 1000. Each sample was normalized by total ion count (TIC) and  
291  $\log_{10}$  transformed prior to statistical analysis.

292 **Cell-type enrichment of patient samples.** Patient cells were filtered through a 40  $\mu\text{m}$  filter. Samples  
293 were enriched for CD8+, CD4+ and CD45- cells (on ice) using three sequential rounds of positive  
294 selection by magnetic bead separation (Miltenyi MACS MicroBeads). CD8- fraction was used for CD4  
295 enrichment, and the CD4- fraction was used for CD45- enrichment to maximize cell recovery.

296 **LC-MS/MS metabolite profiling.** To prepare samples (in triplicate) for metabolite profiling, cells were  
297 washed once with ice-cold saline solution and 1 mL of 80% methanol added to each sample before  
298 vortexing and snap freezing in liquid nitrogen. Samples were subjected to 3 freeze-thaw cycles, and  
299 centrifuged at 14,000 rpm for 15 minutes at 4 °C. The metabolite-containing supernatant was evaporated  
300 until dry. Metabolites were reconstituted in 50  $\mu\text{l}$  of 0.03% formic acid, vortex-mixed, and centrifuged to  
301 remove debris. The supernatant was transferred to a high-performance liquid chromatography (HPLC)  
302 vial for the metabolomics study. Each sample was processed with similar numbers of cells using a  
303 randomized processing scheme to prevent batch effects. We performed qualitative assessment of global  
304 metabolites as previously published on the AB SCIEX QTRAP 5500 triple-quadrupole mass  
305 spectrometer<sup>26</sup>. Chromatogram review and peak area integration were performed using MultiQuant  
306 software version 2.1 (Applied Biosystems SCIEX).

307 **Characterizing metabolic differences across cell types and microenvironments.** Missing metabolite  
308 values were imputed with an ion count of 1000 and normalized peak area calculated for each detected  
309 metabolite using the total ion count from each sample to correct variations introduced from sample  
310 handling through instrument analysis. TIC-normalization was followed by  $\log_{10}$  transformation and  
311 autoNorm row-scaling using *MetaboAnalystR*<sup>27</sup> (default parameters). We conducted exploratory analysis  
312 of metabolome differences across sample types using PCA with the *vegan* R package, and conditioned  
313 the analysis on patient using partial redundancy analysis. Heatmap dendrograms were constructed using

314 Ward's method to cluster Euclidean distances among samples. We identified differentially-abundant  
315 metabolites across cell types and microenvironments using *limma*<sup>28</sup> on the log<sub>10</sub>-transformed row-  
316 normalized metabolite abundances. To simplify interpretation, we specified the model using the group  
317 means parameterization, treating cell types within microenvironments as each group (n=6 groups); for  
318 significance testing we took the average of triplicate measurements for each metabolite to avoid  
319 pseudoreplication, and included patient as a block in the *limma* design. To examine metabolites that  
320 differed across patients we re-fit models in *limma* including patient as a fixed effect. We reported  
321 significance at  $P_{\text{adj}} < 0.05$  (Benjamini-Hochberg correction) for pre-specified contrasts among cell types  
322 and microenvironments.

323 **scRNA-seq.** Single cell transcriptome sequencing was performed on total viably-frozen ascites and  
324 tumor samples using the 10X 5' Gene Expression protocol, following viability enrichment with the  
325 Miltenyi Dead Cell Removal Kit (>80% viability). 5 cases with matched tumor and ascites available  
326 were profiled, although low viability from 1 tumor sample prevented its inclusion. To enable  
327 multiplexing of patients, we combined samples from each patient in lanes of the 10X Chromium  
328 controller, with separate runs for ascites and tumor fractions. Following sequencing (Illumina HiSeq  
329 4000 26x98bp PE, Genome Quebec; mean of 73,488 and 41,378 reads per cell for tumor and ascites,  
330 respectively), we assigned donor identities using *CellSNP* and *Vireo*<sup>29</sup> (based on the common human  
331 SNP VCF provided by *CellSNP* for GRCh38). We excluded unassigned cells and those identified as  
332 doublets, and matched donors between ascites and tumor samples based on the nearest identity-by-state  
333 (IBS) of inferred patient genotypes using *SNPRelate*<sup>30</sup>. Based on this assignment, we retained 3 cases  
334 with abundant cellular representation in both tumor and ascites fractions for downstream analysis.  
335 Following quality filtering steps in the *scater*<sup>31</sup> and *scran*<sup>32</sup> BioConductor packages, this yielded 6,975  
336 cells (2,792 and 4,183 from tumor and ascites, respectively) for analysis. We clustered cells by  
337 expression using *igraph*'s<sup>33</sup> Louvain clustering implementation of the shared nearest neighbour network

338 (SNN) based on Jaccard distance. Clusters were manually annotated into presumptive cell types based  
339 on marker gene expression and visualized with t-SNE.

340 **T cell functional assay.** PBMCs were isolated from a leukapheresis product (Stemcell) by Ficoll  
341 gradient density centrifugation. CD3<sup>+</sup> cells were isolated from the PBMCs using CD3 Microbeads  
342 (Miltenyi). The CD3<sup>+</sup> cells were activated with plate bound CD3 (5 µg/ml), soluble CD28 (3 µg/ml),  
343 and IL-2 (300 U/ml, Proleukin) in the presence or absence of MNA. On the final day of expansion  
344 viability (Fixable Viability Dye eFluor450, eBioscience) and proliferation (123count eBeads, Thermo)  
345 was assessed by flow cytometry. Effector function was assessed by stimulating cells for 4 hours with  
346 PMA (20 ng/ml) and Ionomycin (1 µg/ml) with GolgiStop<sup>TM</sup> and monitored for CD8-PerCP (RPA-T8,  
347 Biolegend), CD4-AF700 (RPA-T4, Biolegend), and TNFα-FITC (MAb11, BD).

348 **Statistical analysis.** Statistical analysis was carried out as described in the text or methods using  
349 GraphPad Prism 8, Microsoft Excel or R v3.6.0. Where multiple samples were taken from the same  
350 patient (e.g. ascites and tumor), we used paired t-tests, or included patient as a random effect in linear or  
351 generalized models, as appropriate. For metabolomic analysis, significance testing was done on means  
352 of triplicate measurements.

### 353 **Data Availability**

354 Raw sequencing data will be deposited at NCBI dbGAP (Accession pending). Processed data files and  
355 scripts to reproduce metabolomics and scRNA-seq analyses are available at  
356 [github.com/vicDRC/onecarbon](https://github.com/vicDRC/onecarbon). Flow cytometry data will be deposited at flowrepository.

### 357 **Code Availability**

358 R scripts to reproduce metabolomic and single cell RNA-seq analyses are available at  
359 [github.com/vicDRC/onecarbon](https://github.com/vicDRC/onecarbon).

360 **Methods References**

- 361 26. Mullen, A. R. *et al.* Oxidation of alpha-ketoglutarate is required for reductive carboxylation in  
362 cancer cells with mitochondrial defects. *Cell Rep.* **7**, 1679–1690 (2014).
- 363 27. Chong, J. & Xia, J. MetaboAnalystR: an R package for flexible and reproducible analysis of  
364 metabolomics data. *Bioinforma. Oxf. Engl.* **34**, 4313–4314 (2018).
- 365 28. Ritchie, M. E. *et al.* limma powers differential expression analyses for RNA-sequencing and  
366 microarray studies. *Nucleic Acids Res.* **43**, e47–e47 (2015).
- 367 29. Huang, Y., McCarthy, D. J. & Stegle, O. Vireo: Bayesian demultiplexing of pooled single-cell  
368 RNA-seq data without genotype reference. *Genome Biol.* **20**, 273 (2019).
- 369 30. Zheng, X. *et al.* A high-performance computing toolset for relatedness and principal component  
370 analysis of SNP data. *Bioinformatics* **28**, 3326–3328 (2012).
- 371 31. McCarthy, D. J., Campbell, K. R., Lun, A. T. L. & Wills, Q. F. Scater: pre-processing, quality  
372 control, normalization and visualization of single-cell RNA-seq data in R. *Bioinformatics* **33**, 1179–  
373 1186 (2017).
- 374 32. Lun, A. T. L., Bach, K. & Marioni, J. C. Pooling across cells to normalize single-cell RNA  
375 sequencing data with many zero counts. *Genome Biol.* **17**, 75 (2016).
- 376 33. Csardi, G. & Nepusz, T. The Igraph Software Package for Complex Network Research. *InterJournal*  
377 *Complex Systems*, 1695 (2005).

378 **Acknowledgements**

379 Thank you to the patients who donated specimens to make this study possible. We thank Mary  
380 Lesperance and Farouk Nathoo for advice on statistical analysis. This work was supported by the  
381 research grants to J.J.L from the US Department of Defence Ovarian Cancer Research Program Pilot  
382 Award (W81XWH-18-1-0264), Canadian Institutes for Health Research (MOP-142351, PJT-162279), to  
383 P.T.H from the Carraresi Family Foundation Award, to B.H.N from the BC Cancer Foundation, and the  
384 Canadian Foundation for Innovation. M.K.K is supported by a University of Victoria Graduate Award.  
385 P.T.H. is supported by a Canadian Institutes for Health Research Post-Doctoral Fellowship.  
386 Biospecimens were obtained with assistance from the IROC-TTR biobank. Single cell library  
387 preparations and RNA sequencing were provided by Genome Quebec.

388 **Author Contributions**

389 M.K.K. and P.T.H. designed and performed experiments, analyzed the data, and wrote the manuscript.  
390 S.M., S.K., and B.P. helped perform the metabolite profiling experiments. P.T.H., J.S, B.A., J.S, and  
391 B.H.N. generated the scRNA-seq data. L.Z. and R.J.D. generated and analyzed the LC-MS/MS data.  
392 P.H.W. oversaw biospecimen collection through the IROC-TTR. J.J.L. conceived the project and wrote  
393 the manuscript.

394 **Competing Interests Statement**

395 J.S. is a permanent member and owns stocks of Surface Oncology. R.J.D is a member of the Scientific  
396 Advisory Board at Agios Pharmaceuticals.

397 **Corresponding Author**

398 Correspondence to Julian J. Lum.

399 **Extended data**

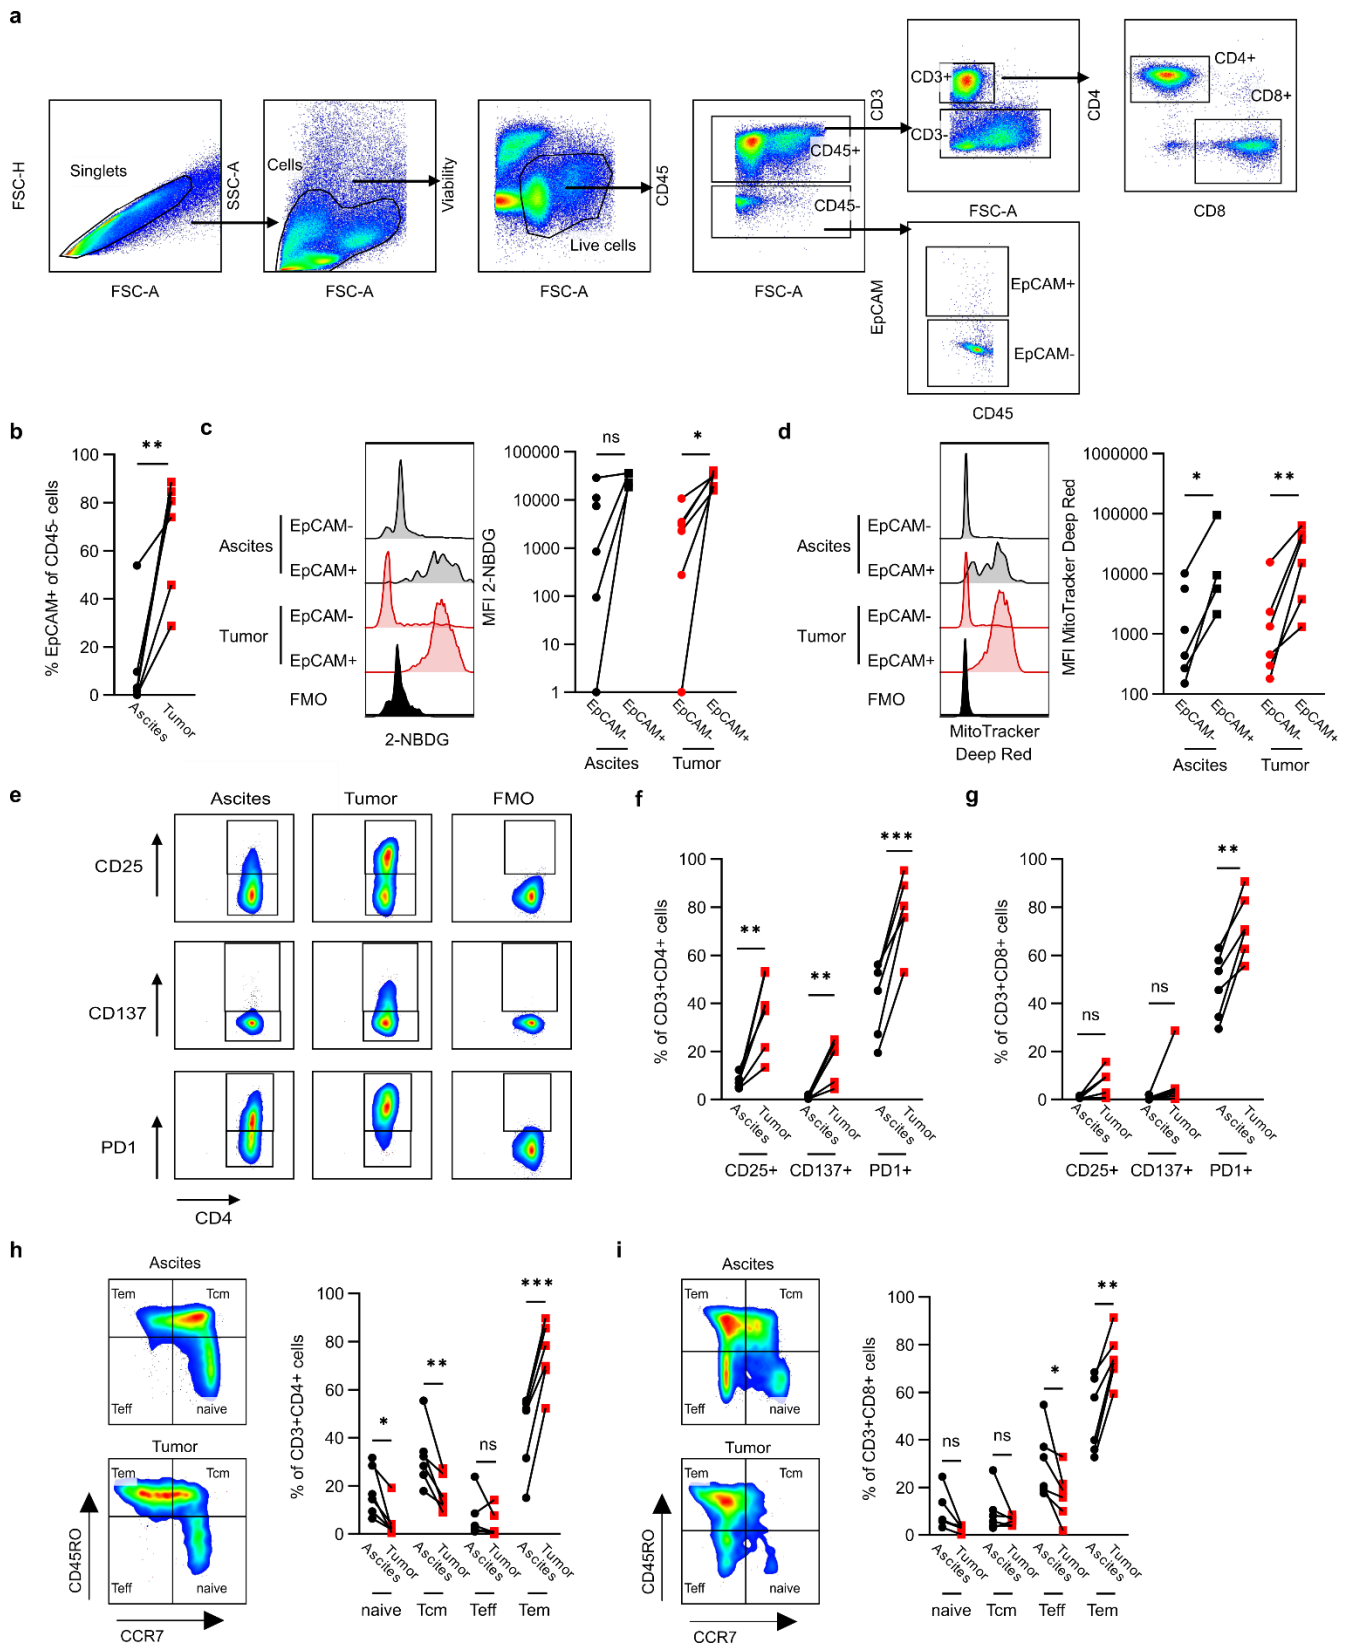

401 **Extended Data Figure 1 | Phenotypic characterization of ascites and tumor by flow cytometry. a,**  
402 **Representative gating strategy for analysis by flow cytometry. b, Proportion of EpCAM+ (of CD45-)**  
403 **tumor cells within ascites and tumor. c, d, Representative plot (left) and tabulated data (right) for**  
404 **glucose uptake (2-NBDG) (e) and mitochondrial activity (MitoTracker Deep Red) (d) of**  
405 **EpCAM+CD45- tumor and EpCAM-CD45- stromal cells from ascites and tumor. e, Representative**  
406 **gating strategy for CD25, CD137 and PD1 expression by flow cytometry. f, g, CD25, CD137 and PD1**  
407 **expression on CD4+ T cells (f) and CD8+ T cells (g). h, i, Naive, central memory (Tcm), effector (Teff),**  
408 **and effector memory (Tem) phenotype based on CCR7 and CD45RO expression. Representative plot**  
409 **(left) and tabulated data (right) for CD4+ T cells (h) and CD8+ T cells (i) from ascites and tumor. P-**  
410 **values (\*p<0.05, \*\*p<0.01, \*\*\*p<0.001) determined by paired t-test (b-d, f-i). Median Fluorescence**  
411 **Intensity (MFI).**

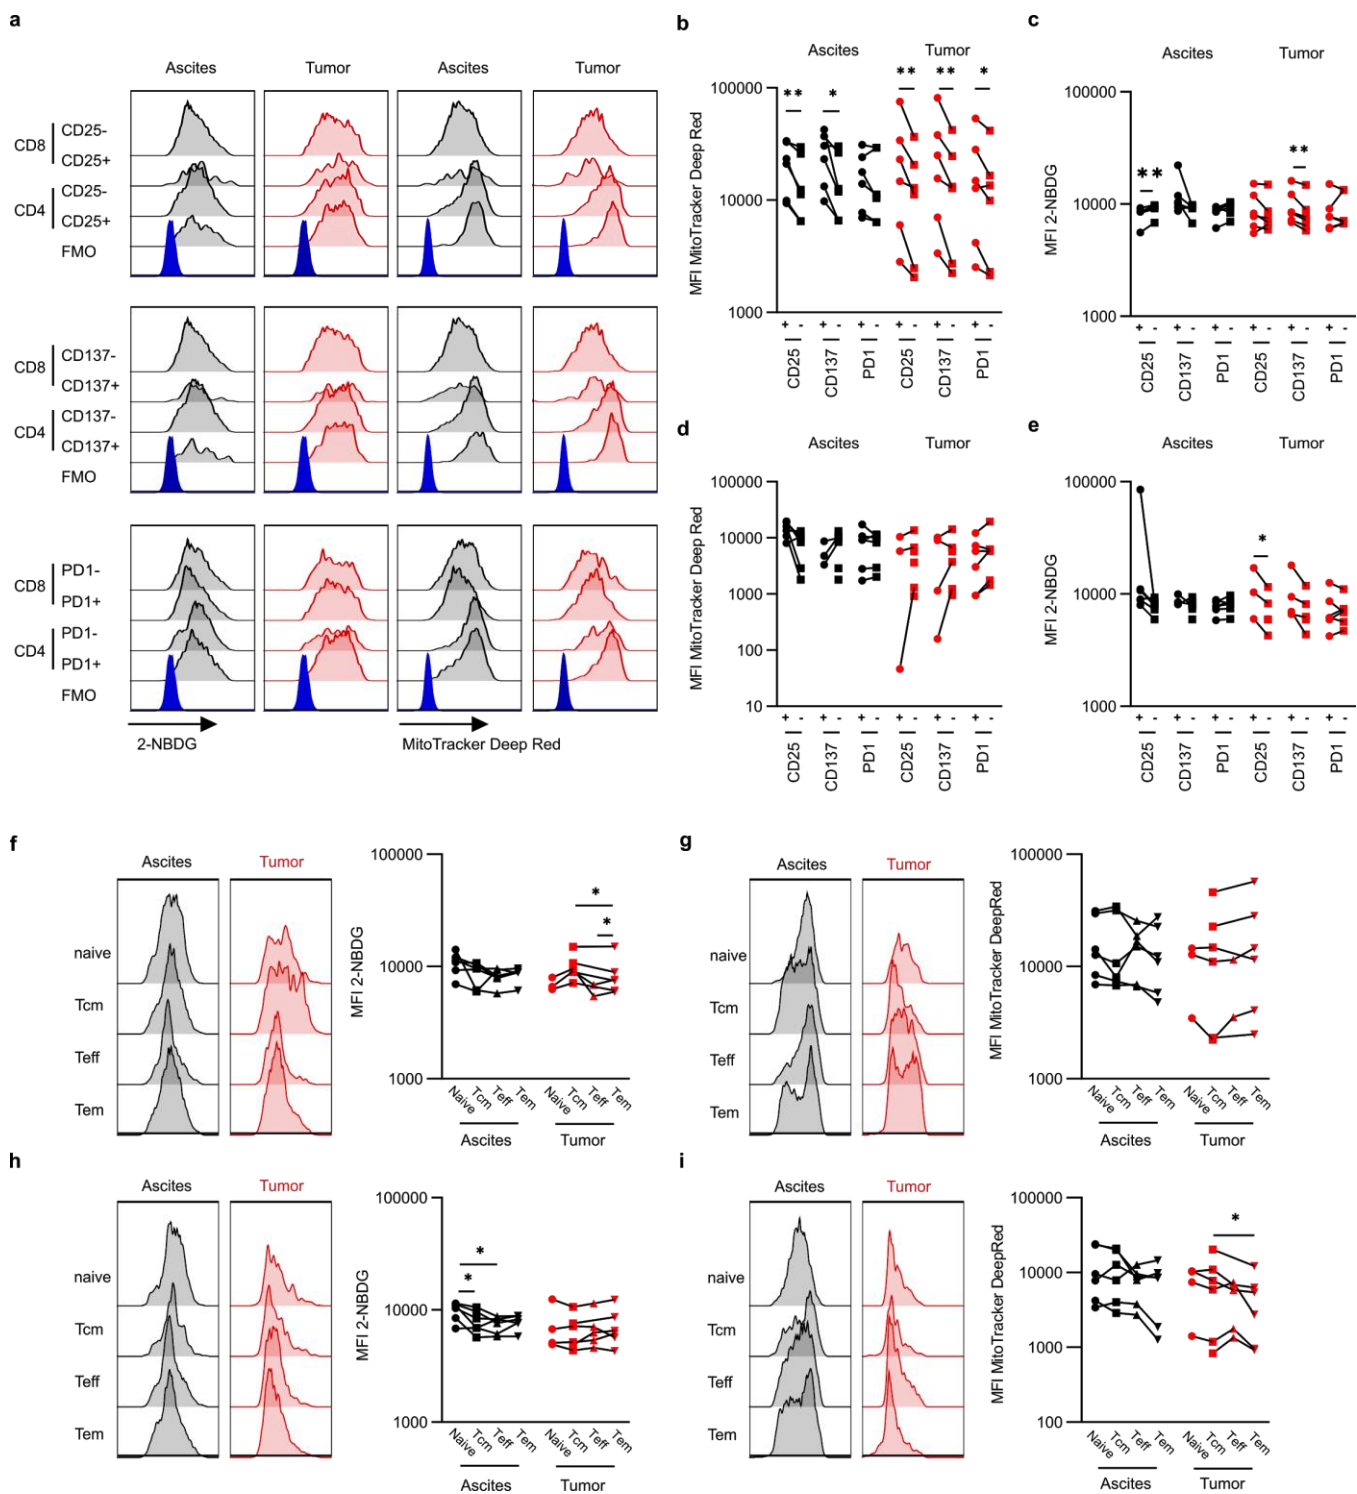

412

413 **Extended Data Figure 2 | T cell metabolism is impacted by expression of activation markers. a,**

414 Representative plots of glucose uptake (2-NBDG) and mitochondrial activity (MitoTracker Deep Red)

415 for CD25, CD137 and PD1 positive and negative CD4 and CD8 T cells. **b, c,** Mitochondrial activity (**b**

416 and glucose uptake (**c**) of CD25, CD137 and PD1 CD4+ T cells. **d, e,** Mitochondrial activity (**d**) and



417 glucose uptake (**e**) of CD25, CD137 and PD1 CD8<sup>+</sup> T cells. **f, g**, Representative plot (left) and tabulated  
418 data (right) for glucose uptake (**f**) and mitochondrial activity (**g**) of naive, Tcm, Teff and Tem CD4<sup>+</sup> T  
419 cells. **h, i**, Representative plot (left) and tabulated data (right) for glucose uptake (**h**) and mitochondrial  
420 activity (**i**) of naive, Tcm, Teff and Tem CD8<sup>+</sup> T cells. P-values (\* $p < 0.05$ , \*\* $p < 0.01$ , \*\*\* $p < 0.001$ )  
421 determined by paired t-test **b-i**). Lines indicate matched patients (**b-i**). Fluorescence Minus One (FMO);  
422 Median Fluorescence Intensity (MFI); Central memory T cells (Tcm); Effector T cells (Teff); Effector  
423 memory T cells (Tem).

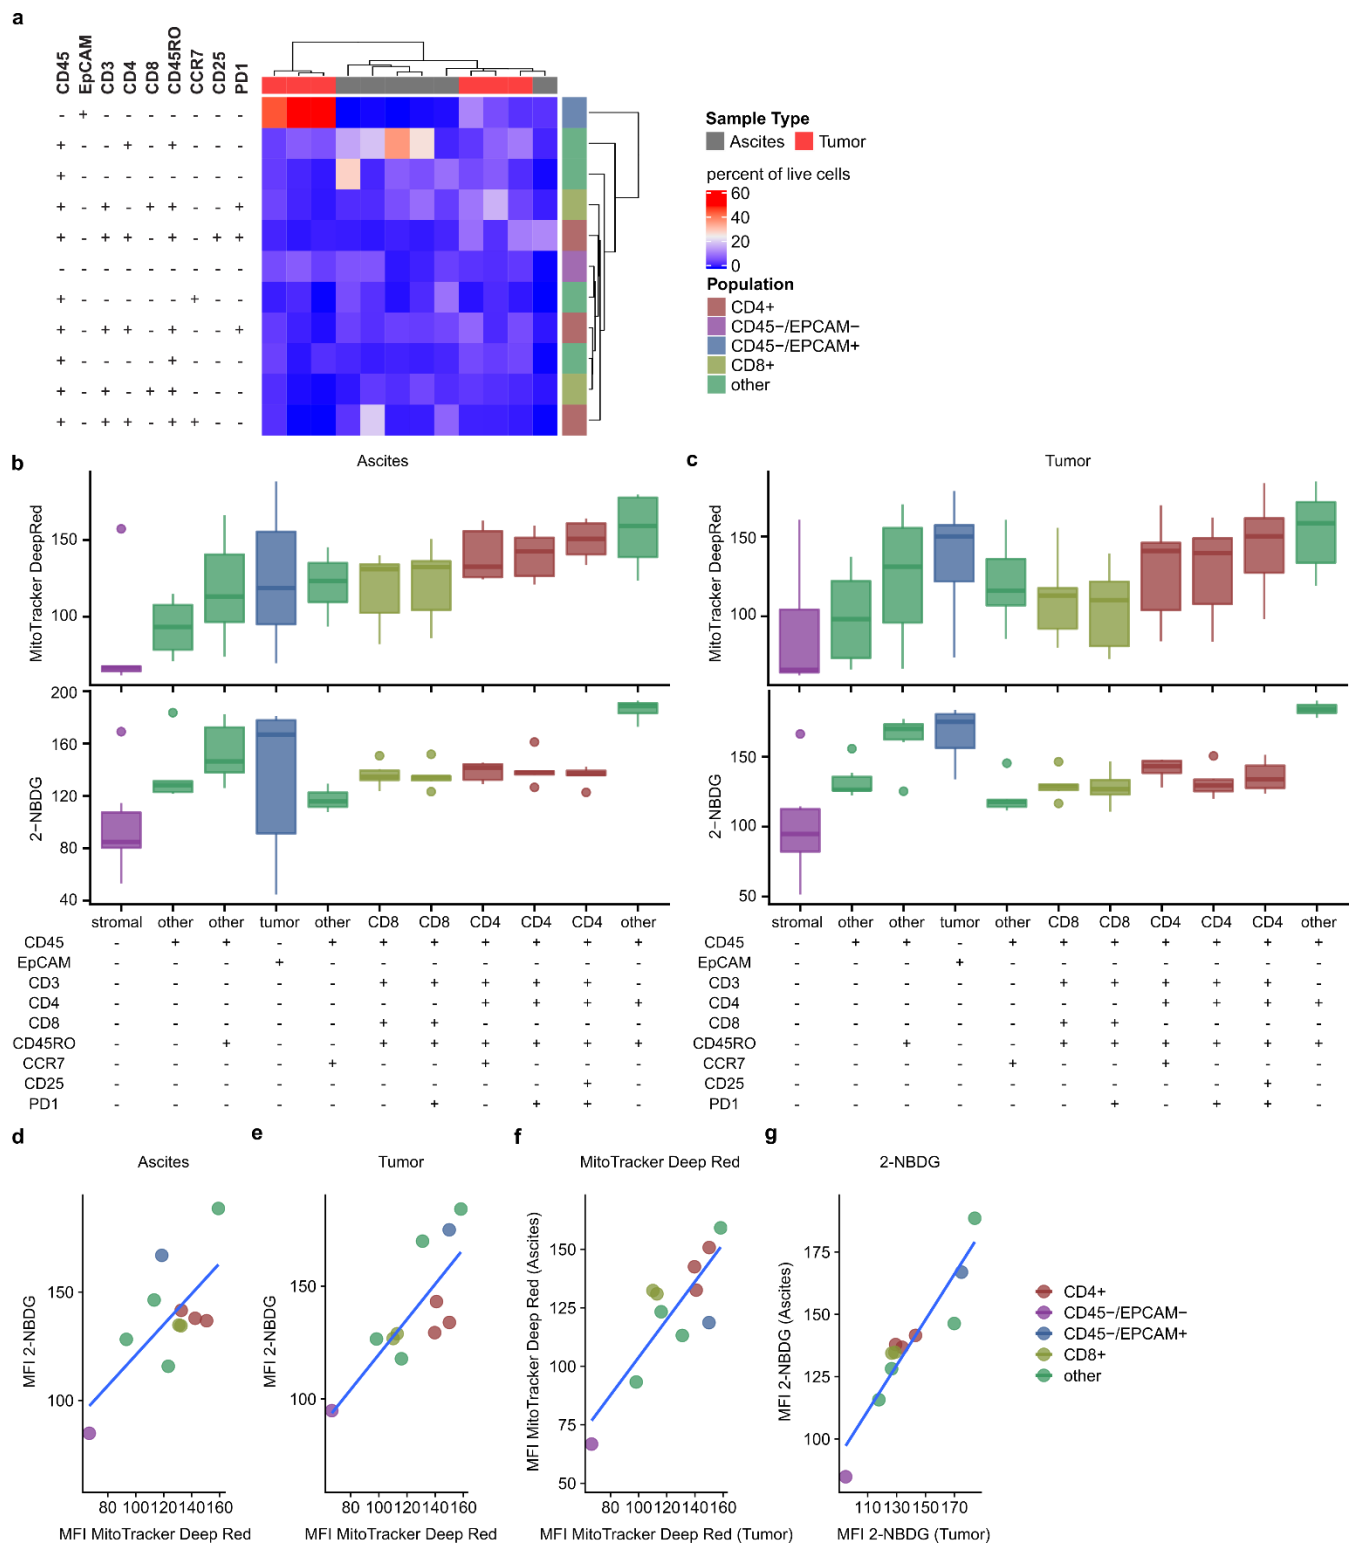

428 data (box whiskers; excepting outliers, shown as points) **d, e**, Correlation between glucose uptake and  
429 mitochondrial activity of cell fractions within the ascites (**d**) and tumor (**e**). **f, g**, Correlation of glucose  
430 uptake (**f**) and mitochondrial activity (**g**) of cell fractions between ascites and tumor. Median (per  
431 phenotype) of median (per sample) biexponential-transformed Median Fluorescence Intensity (MFI)  
432 values shown.

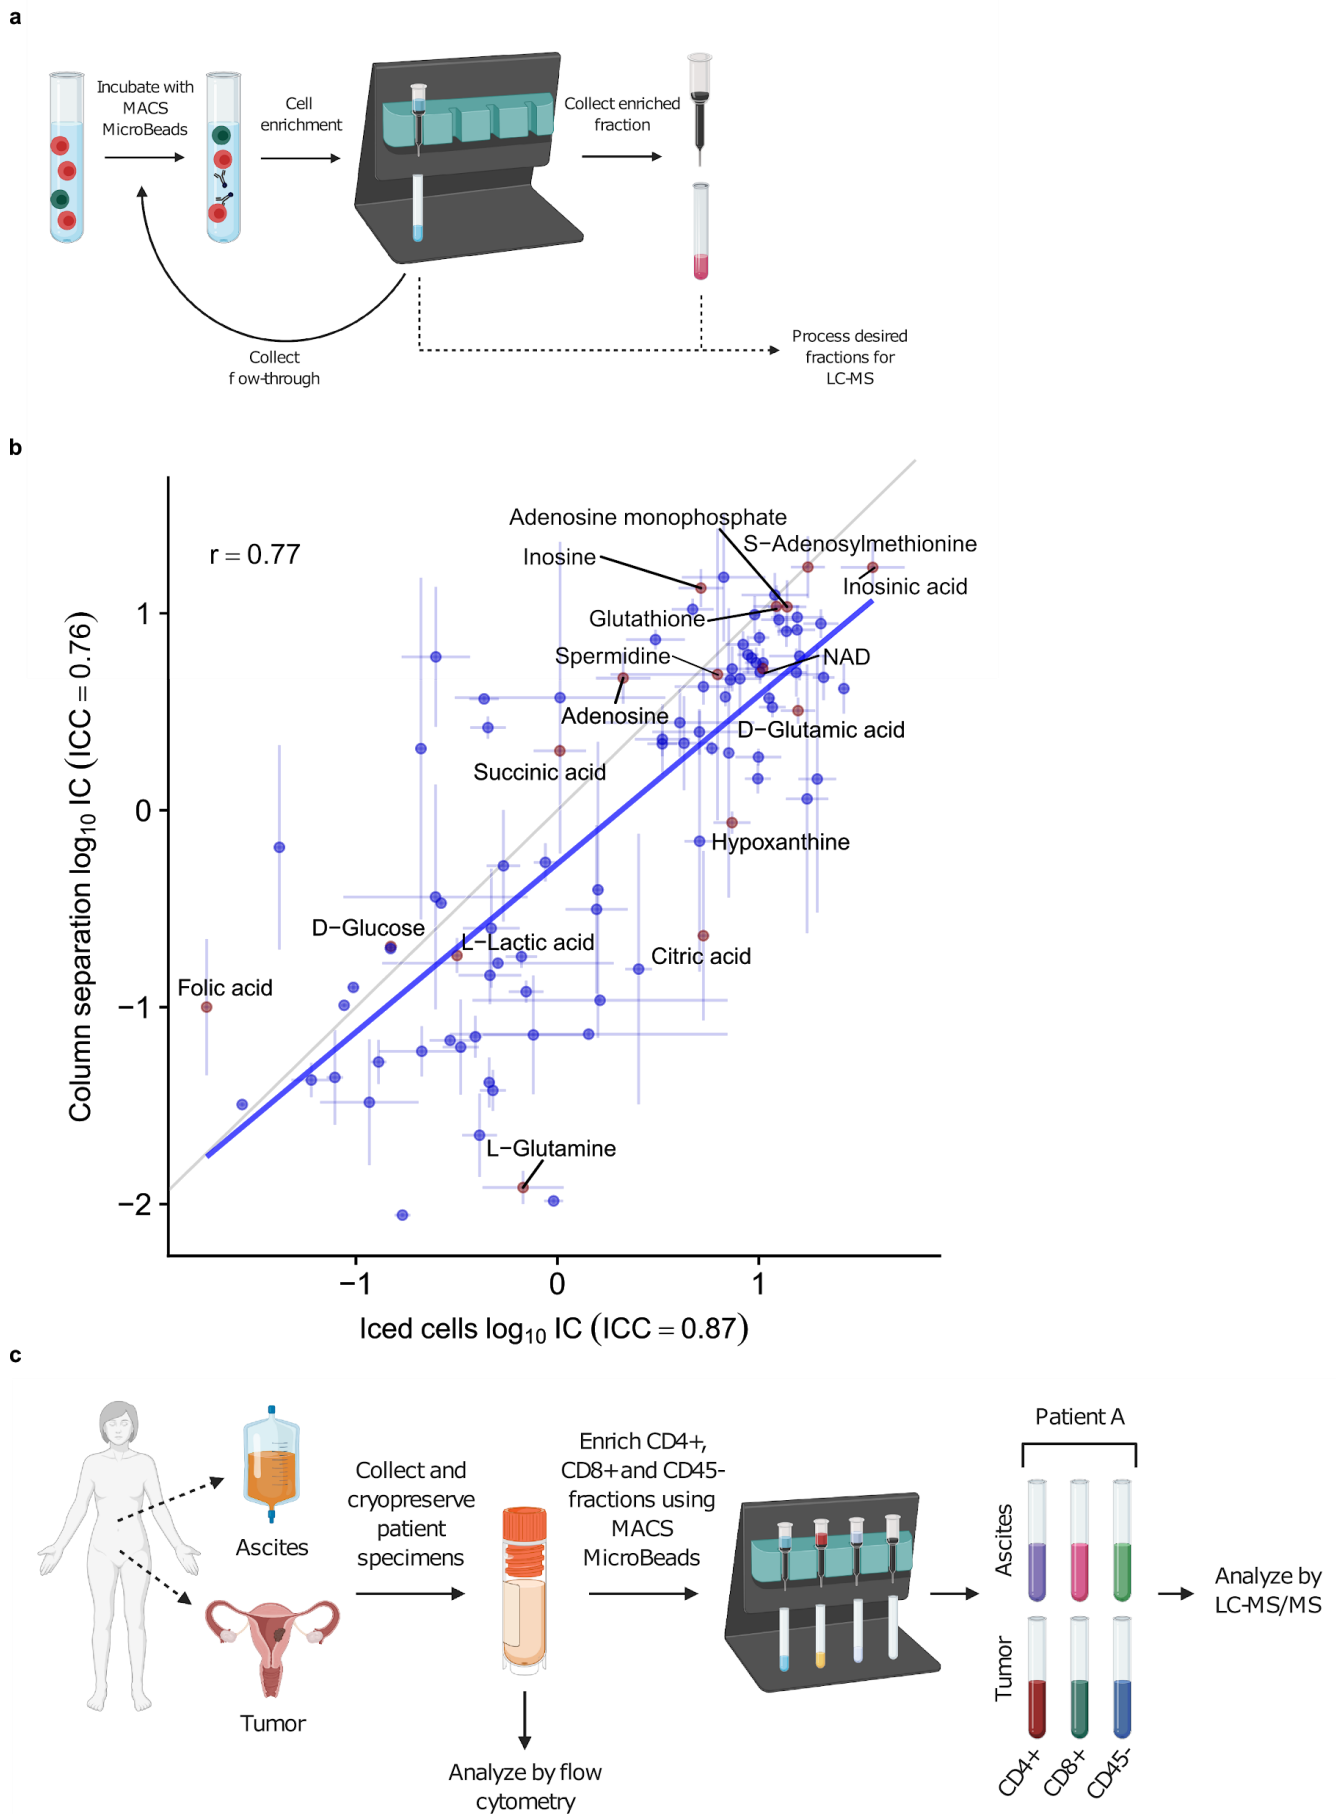

434 **Extended Data Figure 4 | Schematic workflow and impact of enrichment on metabolite profiling.**  
435 **a**, Schematic of magnetic bead enrichment. Cells underwent three consecutive rounds of magnetic bead  
436 enrichment or remained on ice. **b**, Impact of enrichment type on metabolite abundance. Means of  
437 triplicate measurements for each enrichment type +/- SE shown. Gray line represents 1:1 relationship.  
438 Intraclass correlation for replicate measurements (ICC) shown in axis labels. **c**, Schematic of patient  
439 metabolite profiling workflow. Ascites or tumor was collected from patients and cryopreserved. A  
440 fraction of each sample was analyzed by flow cytometry, while the remaining sample underwent three  
441 rounds of enrichment for CD4+, CD8+ and CD45- cells. These cell fractions were analyzed using LC-  
442 MS/MS.

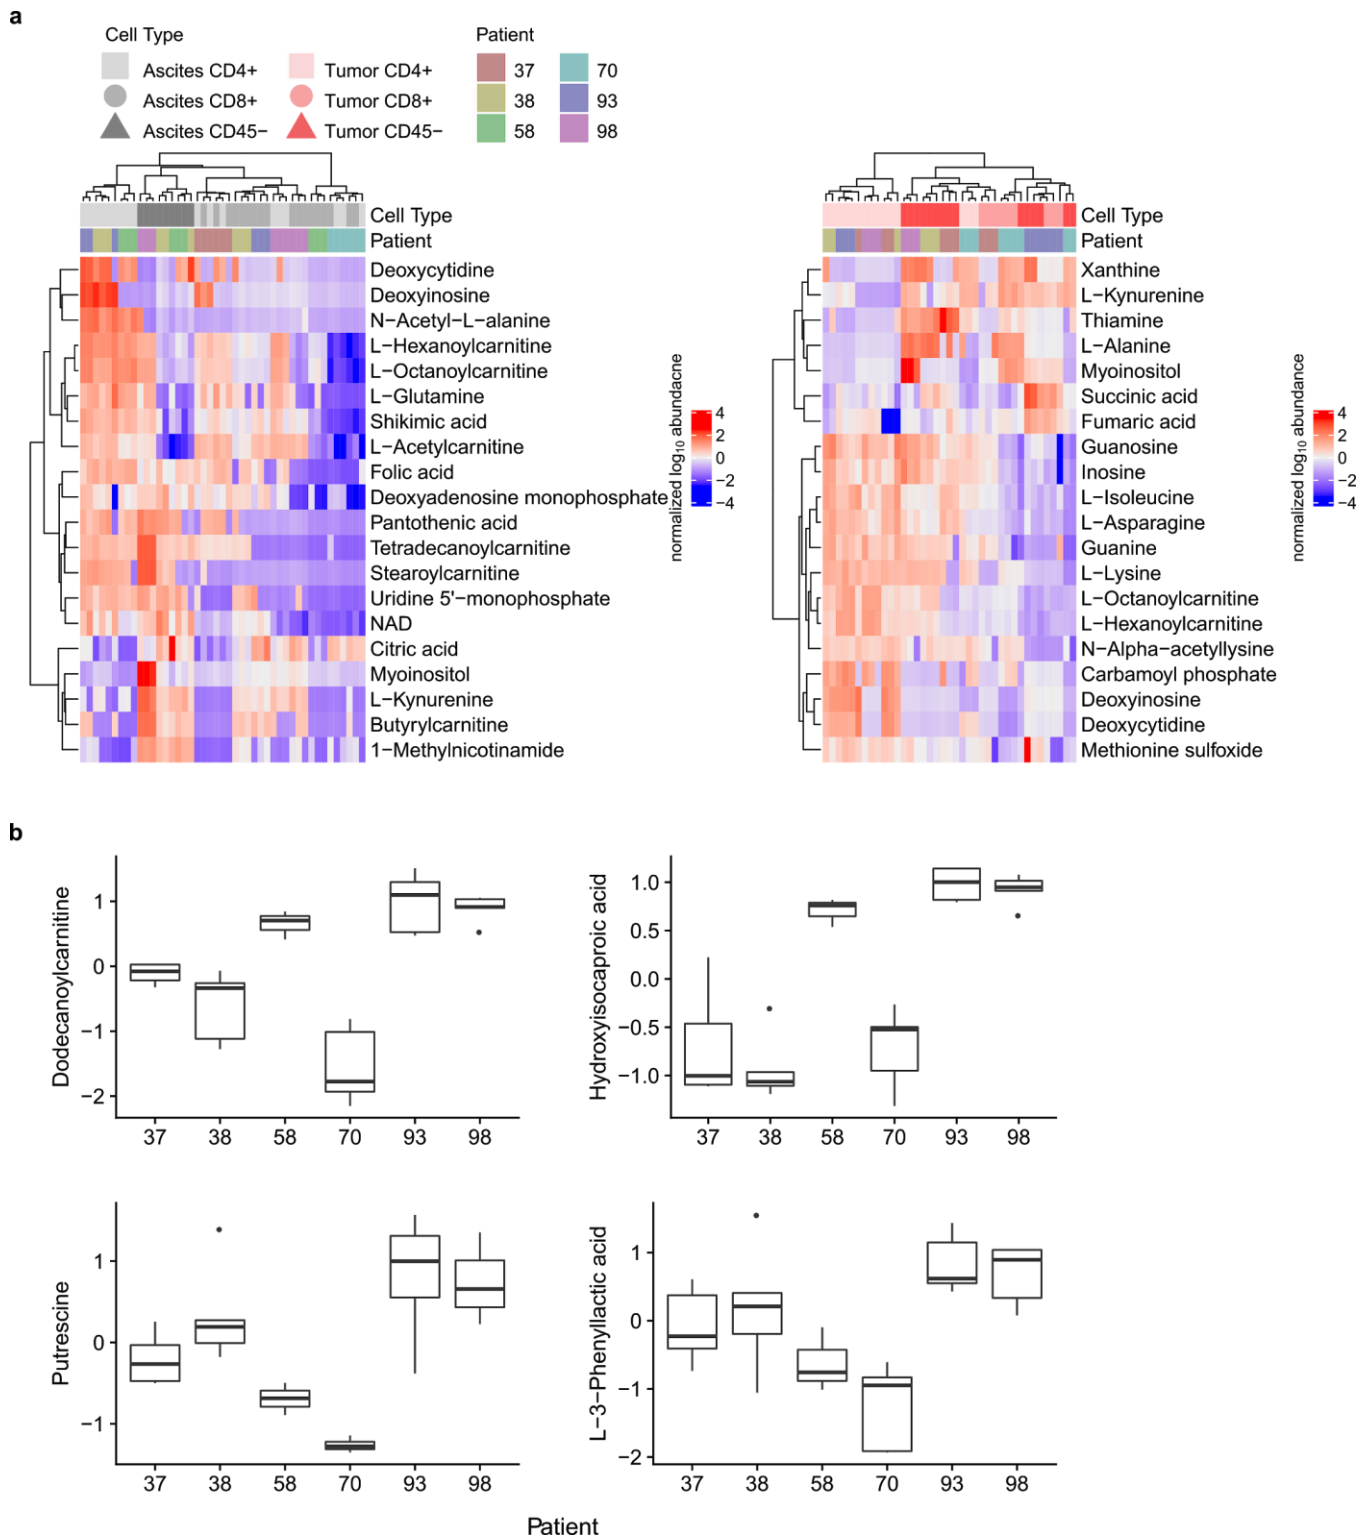

443

444 **Extended Data Figure 5 | Changes in relative metabolite abundance across cell types within ascites**

445 **and tumor. a**, Heatmap of normalized metabolite abundance, with dendrograms representing Ward's

446 clustering of Euclidean distances among samples. Relative abundance of metabolites in the ascites (left)

447 and tumor (right). **b**, Top four significantly differing metabolites across patients (all  $P_{adj}$  for F-Test of  
448 patient effect in *limma* < 0.05). Boxplots show medians (lines), interquartile range (box hinges) range of  
449 data up to 1.5X interquartile range (box whiskers; excepting outliers, shown as points).

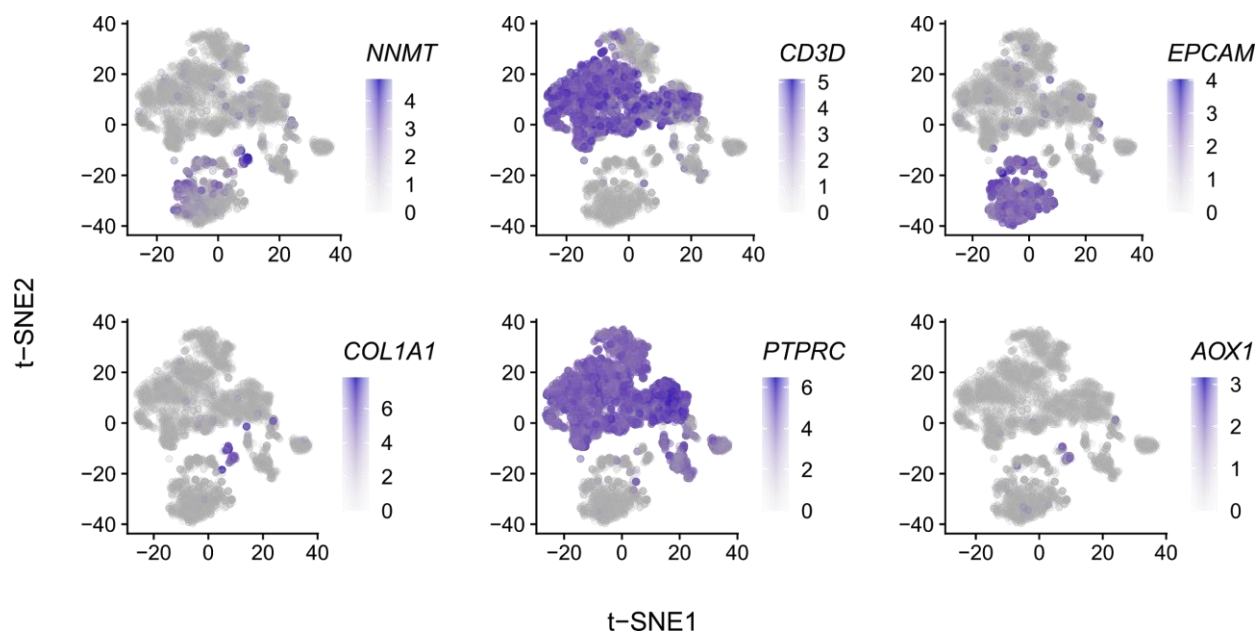

450

451 **Extended Data Figure 6 | Expression of population defining makers and metabolic genes within**  
452 **the scRNA-seq data.** Expression of *NNMT*, *CD3D*, *EPCAM*, *COL1A1*, *PTPRC* and *AOX1* within  
453 ascites and tumor, shown as log<sub>2</sub> normalized unique molecular identifier (UMI) counts.

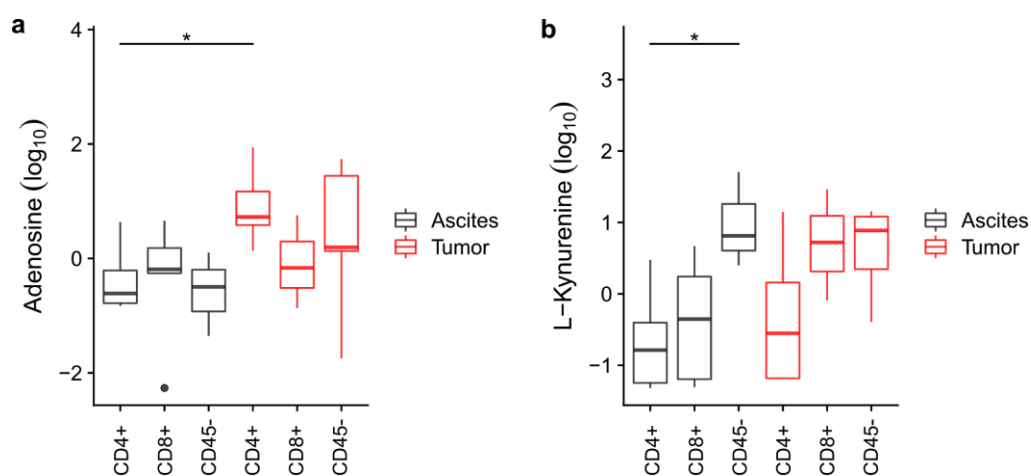

454

455 **Extended Data Figure 7 | Relative abundance of adenosine (a) and L-kynurenine (b) measured by**  
456 **LC-MS/MS.** P-values determined as described in methods (\*p<0.05). Boxplots show medians (lines),

457 interquartile range (box hinges) and range of data up to 1.5X interquartile range (box whiskers; outliers  
 458 shown as points). P values determined using *limma* as per Figure 3.

459

460 **Extended Data Table 1 | HGSC patient characteristics for metabolic profiling by flow cytometry**  
 461 **and LC-MS/MS.**

| Patient | Tumor location | Age at surgery | Survival (months)* | Tumor stage† | Tumor grade† | Ascites volume (mL) |
|---------|----------------|----------------|--------------------|--------------|--------------|---------------------|
| 37      | omentum        | 70             | 12                 | 3C           | 3            | 1800                |
| 38      | ovary          | 40             | 16                 | T3b          | 3            | 1200                |
| 70      | omentum        | 50             | 23                 | 3C           | 3            | 80                  |
| 58      | omentum        | 78             | 18                 | 4            | 3            | 2000                |
| 93      | fallopian tube | 53             | 82                 | 3B           | 2            | 1600                |
| 98      | omentum        | 39             | 13                 | 3C           | 3            | 2000                |

462 \* Survival calculated from the date of diagnosis to the date of death

463 † Tumor stage and grade were determined by a pathologist at the time of surgery

464

465 **Extended Data Table 2 | Flow cytometry metabolic profiling panel.**

| Fluorochrome    | Marker               | Expression             | Clone    | Company   | Catalogue number |
|-----------------|----------------------|------------------------|----------|-----------|------------------|
| ---             | 2-NBDG               | Glucose uptake         | ---      | Thermo    | N13195           |
| PE              | CD326 (EpCAM)        | Epithelial cells       | 1B7      | Thermo    | 12-9326-42       |
| PerCP           | CD8                  | Effector T cells       | RPA-T8   | Biolegend | 301030           |
| PerCP-eFluor710 | CD25                 | Activation/Tregs       | 4E3      | Thermo    | 46-0257-41       |
| PE-Cy7          | CD45RO               | Phenotype              | UCHL1    | Thermo    | 25-0457-42       |
| ---             | MitoTracker Deep Red | Mitochondrial activity | ---      | Thermo    | M22426           |
| AF700           | CD4                  | Helper T cells         | RPA-T4   | Biolegend | 300526           |
| APC/Fire750     | CCR7                 | Phenotype              | G043H7   | Biolegend | 353246           |
| eFlour506       | Viability            | Live/dead cells        | ---      | Thermo    | 65-0866-14       |
| PO              | CD45                 | Leukocytes             | HI30     | Thermo    | MHCD4530         |
| BV605           | CD137                | Activation             | 4B4-1    | Biolegend | 309822           |
| BV650           | CD279 (PD1)          | Activation/Exhaustion  | EH12.2H7 | Biolegend | 329950           |
| BV750           | CD3                  | T cells                | SK7      | Biolegend | 344845           |

466

467



468 **Extended Data Table 3 | HGSC patient characteristics for single cell RNA sequencing.**

| Patient | Tumor location | Age at surgery | Survival (months)* | Tumor stage <sup>†</sup> | Tumor grade <sup>†</sup> |
|---------|----------------|----------------|--------------------|--------------------------|--------------------------|
| 46      | ovary          | 54             | 24                 | 3C                       | 3                        |
| 58      | omentum        | 78             | 18                 | 4                        | 3                        |
| 59      | omentum        | 68             | 26                 | 3C                       | 3                        |
| 69      | omentum        | 59             | 17                 | 3C                       | 3                        |
| 109     | ovary          | 77             | 62                 | 3C                       | 3                        |

469 \* Survival calculated from the date of diagnosis to the date of death

470 † Tumor stage and grade were determined by a pathologist at the time of surgery
